# Supplementary material for: Survey of Freshly-Harvested Oat Grains from Southern Brazil Reveals High Incidence of Type B Trichothecenes and Associated Fusarium Species
Source: Preprints.org preprint supplement (doi:10.20944/preprints202111.0212.v1), 2021-11-11
Supplement: Supplementary file 1 [file supplementary]

## Sheet: Plan1
Accession number	Isolate	Genotype	Origin	NCBI accession	Reference
				(d) RPB2
(a) FML10	F. graminearum	(b) 15-ADON	Oat, Rio Grande do Sul	MW929720	This study
FML126	F. graminearum	15-ADON	Oat, Paraná	MW929745	This study
FML39	F. graminearum	15-ADON	Oat, Rio Grande do Sul	MW929729	This study
FML42	F. graminearum	15-ADON	Oat, Rio Grande do Sul	MW929731	This study
FML69	F. graminearum	15-ADON	Oat, Rio Grande do Sul	MW929734	This study
FML85	F. graminearum	15-ADON	Oat, Rio Grande do Sul	MW929738	This study
FML01	F. meridionale	(b) NIV	Oat, Rio Grande do Sul	MW929719	This study
FML108	F. meridionale	NIV	Oat, Rio Grande do Sul	MW929741	This study
FML112	F. meridionale	NIV	Oat, Paraná	MW929742	This study
FML13	F. poae	NIV	Oat, Rio Grande do Sul	MW929721	This study
FML15	F. poae	NIV	Oat, Rio Grande do Sul	MW929722	This study
FML17	F. poae	NIV	Oat, Rio Grande do Sul	MW929723	This study
FML20	F. poae	NIV	Oat, Rio Grande do Sul	MW929724	This study
FML23	F. poae	NIV	Oat, Rio Grande do Sul	MW929725	This study
FML25	F. poae	NIV	Oat, Rio Grande do Sul	MW929726	This study
FML35	F. poae	NIV	Oat, Rio Grande do Sul	MW929727	This study
FML37	F. poae	NIV	Oat, Rio Grande do Sul	MW929728	This study
FML52	F. poae	NIV	Oat, Rio Grande do Sul	MW929732	This study
FML74	F. poae	NIV	Oat, Rio Grande do Sul	MW929735	This study
FML75	F. poae	NIV	Oat, Rio Grande do Sul	MW929736	This study
FML76	F. poae	NIV	Oat, Rio Grande do Sul	MW929737	This study
FML93	F. poae	NIV	Oat, Rio Grande do Sul	MW929739	This study
FML102	F. poae	NIV	Oat, Paraná	MW929740	This study
FML119	F. poae	NIV	Oat, Paraná	MW929743	This study
FML124	F. poae	NIV	Oat, Paraná	MW929744	This study
FML40	F. incarnatum-equiseti	(c) N/A	Oat, Rio Grande do Sul	MW929730	This study
FML66	F. avenaceum	N/A	Oat, Rio Grande do Sul	MW929733	This study
CBS128539	F. graminearum	N/A	Wheat seed, Belgium	KT855208.1	Kulik, 2015
CBS138561	F. graminearum	N/A	N/A	KT855209.1	Kulik, 2015
CBS138562	F. graminearum	N/A	N/A	KT855210.1	Kulik, 2015
CBS138563	F. graminearum	N/A	N/A	KT855211.1	Kulik, 2015
CBS139513	F. graminearum	N/A	Barley, Argentina	KT855213.1	Kulik, 2015
NRRL26916	F. boothii	N/A	Corn, South Africa	KM361659.1	Aoki et al., 2017
NRRL28721	F. meridionale	N/A	Corn, Nepal	LHUA01	Walkowiak et al., 2016
NRRL28436	F. meridionale	N/A	Sweet potato, New Caledonia	KM361660.1	Aoki et al., 2014
NRRL29297	F. cortaderiae	N/A	Cortaderia sp. (toetoe), New Zealand	KM361662.1	Aoki et al., 2014
NRRL28585	F. austroamericanum	N/A	Herbaceous vine, Brazil	KM361661.1	Aoki et al., 2015
NRRL13818	F. asiaticum	N/A	Barley, Japan	JX171573.1	O´Donnell et al., 2013
NRRL25475	F. culmorum	N/A	Barley, Denmark	JX171628.1	O´Donnell et al., 2013
FRC_R09618	F. culmorum	N/A	N/A	GQ915490.1	Proctor et al., 2009
CBS139512	F. culmorum	N/A	Wheat, Poland	KT855212.1	Kulik, 2015
NRRL13721	F. cerealis	N/A	Potato, Poland	KM361656.1	Aoki et al., 2018
FRC_R09624	F. cerealis	N/A	N/A	GQ915489.1	Proctor et al., 2009
NRRL28062	F. pseudograminearum	N/A	Barley, Australia	JX171637.1	O´Donnell et al., 2013
FRC_T0962	F. poae	N/A	N/A	GQ915495.1	Proctor et al., 2009
NRRL13714	F. poae	N/A	Wheat, Canada	JX171572.1	O´Donnell et al., 2013
FRC_R09186	F. venenatum	N/A	N/A	GQ915499.1	Proctor et al., 2009
FRC_R07843	F. sambucinum	N/A	N/A	GQ915496.1	Rocha et al., 2015; Proctor et al., 2009
NRRL26417	F. incarnatum-equiseti	N/A	Plant leaf litter, Cuba	JX171635.1	O´Donnell et al., 2013
NRRL32175	F. incarnatum-equiseti	N/A	N/A	JX171645.1	O´Donnell et al., 2013
NRRL20697	F. equiseti	N/A	Beet root, Chile	JX171595.1	O´Donnell et al., 2013
NRRL13402	F. equiseti	N/A	Pine nursery soil, Australia	JX171566.1	O´Donnell et al., 2013
FRC_R09495	F. avenaceum	N/A	N/A	GQ915486.1	Proctor et al., 2009
NRRL25481	F. tricinctum	N/A	Wheat, Germany	JX171629.1	O´Donnell et al., 2013; 2018
NRRL13459	F. concolor	N/A	Plant debris, South Africa	JX171569.1	O´Donnell et al., 2013
(a) Isolate accessions: CBS: Westerdijk Fungal Biodiversity Institute at Utrecht, Netherlands; FRC: Fusarium Research Centre culture collection at Pennsylvania State University, State College, PA, USA; NRRL: Northern Regional Research Centre culture collection at the United States Department of Agriculture (USDA), Agricultural Research Service (ARS), Peoria, IL, USA; FML: Food Microbiology Labora…
(b) NIV: nivalenol; 15-ADON: 15-acetyl deoxynivalenol;
(c) Not available;
(d) Locus used in this study: RNA Polymerase II Second Largest (RPB2) Subunit.
